# Supplementary material for: MAL Daylight Photodynamic Therapy for Actinic Keratosis: Clinical and Imaging Evaluation by 3D Camera
Source: MDPI journal article supplement (doi:10.3390/ijms17071108), 2016-07-11
Supplement: s1 [file s1]

# Supplementary Materials: MAL Daylight Photodynamic Therapy for Actinic Keratosis: Clinical and Imaging Evaluation by 3D Camera

Carmen Cantisani, Giovanni Paolino, Giovanni Pellacani, Dario Didona, Marco Scarno, Valentina Faina, Tommaso Gobello and Stefano Calvieri

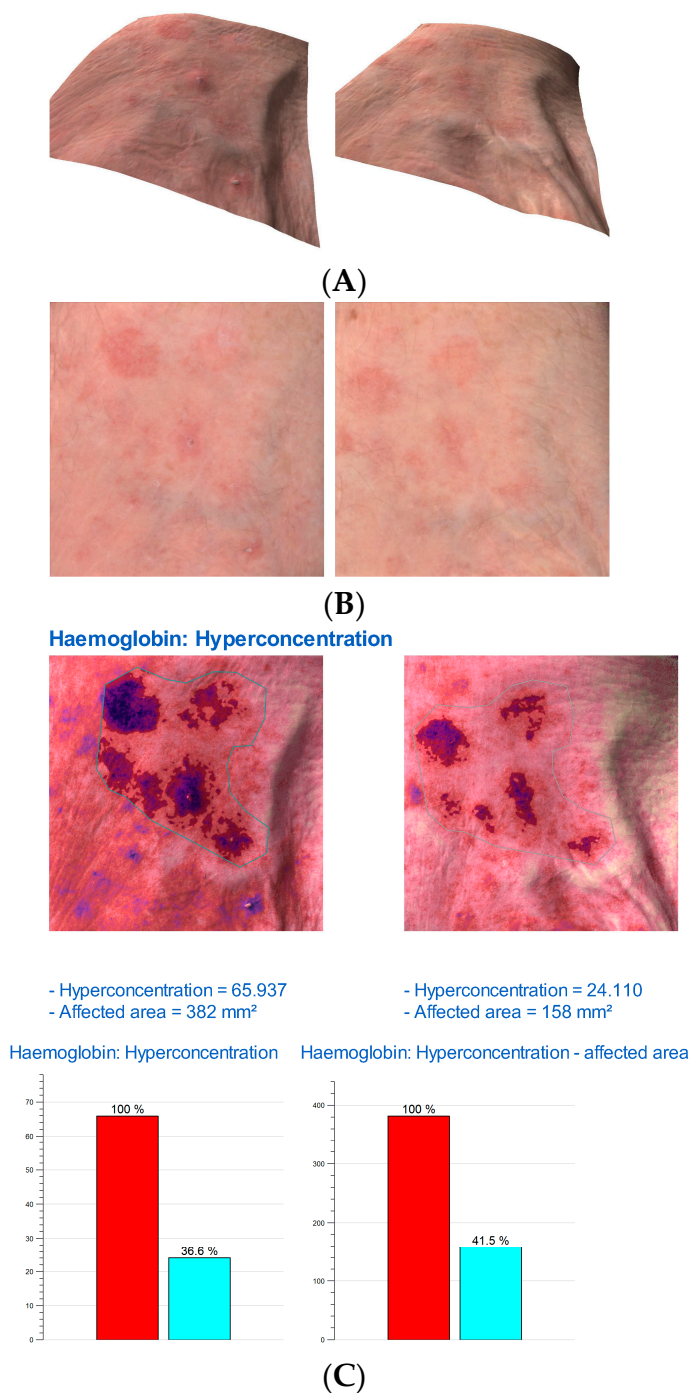

Figure S1. Cont.

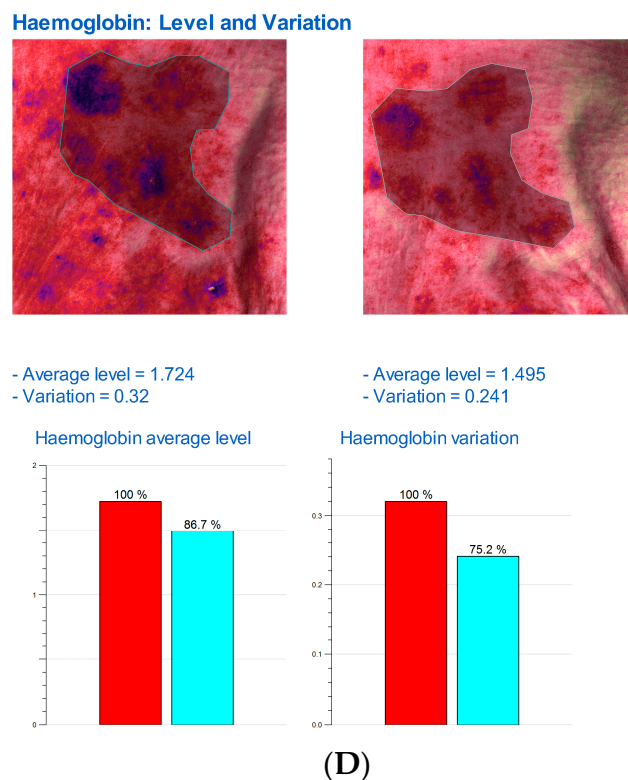

**Figure S1.** (A) Multiple actinic keratoses highlighted by Antera 3D, Miravex; (B) A particular of the same actinic keratoses; (C) Hemoglobin concentration in the affected area and variation of hemoglobin before and after one treatment. The **left** figures are before the treatment, while the **right** figures are after the treatment. In the graphs there is represented the variation of hemoglobin before (red column) and after one treatment (blue column); (D) Hemoglobin concentration in the affected area and variation of hemoglobin before and after one treatment. The **left** figures are before the treatment, while the **right** figures are after the treatment. In the graphs there is represented the variation of hemoglobin before (red column) and after one treatment (blue column).
